# Supplementary material for: Construction of two novel borotungstates modified by different ligands connected with single/double bridges
Source: Royal Society of Chemistry journal article supplement (doi:10.1039/c6nj00155f), 2016-01-01
Supplement: c6nj00155f1.pdf [file c6nj00155f1.pdf]

## Supporting Information

### Construction of two novel borotungstates modified by different ligands connected with single/double bridge

Wang Shuo<sup>1</sup>, Yu Kai<sup>\*,1</sup>, Wang Bo<sup>2</sup>, Wang Lu<sup>2</sup>, Wang Chunxiao<sup>1</sup>, Zhang He<sup>1</sup>, Wang Chunmei<sup>1</sup>,  
Zhou Baibin<sup>\*,1</sup>

<sup>1</sup> Key Laboratory for Photonic and Electronic Bandgap Materials, Ministry of Education, Harbin Normal University, Harbin 150025, People's Republic of China; E-mail: hlyukai188@163.com(K.Yu); zhou\_bai\_bin@163.com(B.B.Zhou)

<sup>2</sup> School of Chemical Engineering, Harbin Institute of Technology, Harbin, Heilongjiang 150001, China

#### 1.Structural figures

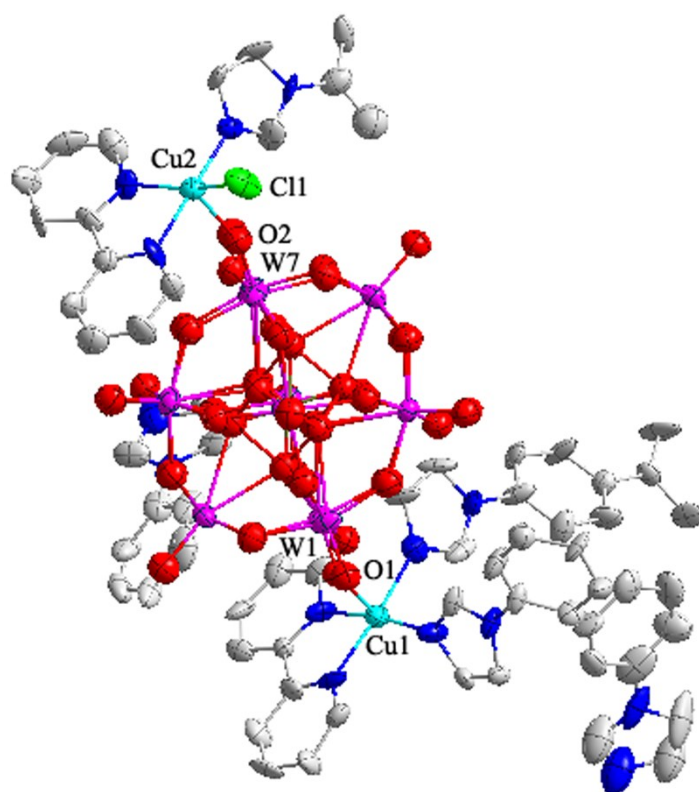

**Figure S1** ORTEP view of the basic units in compound **1** with 50% thermal ellipsoid.

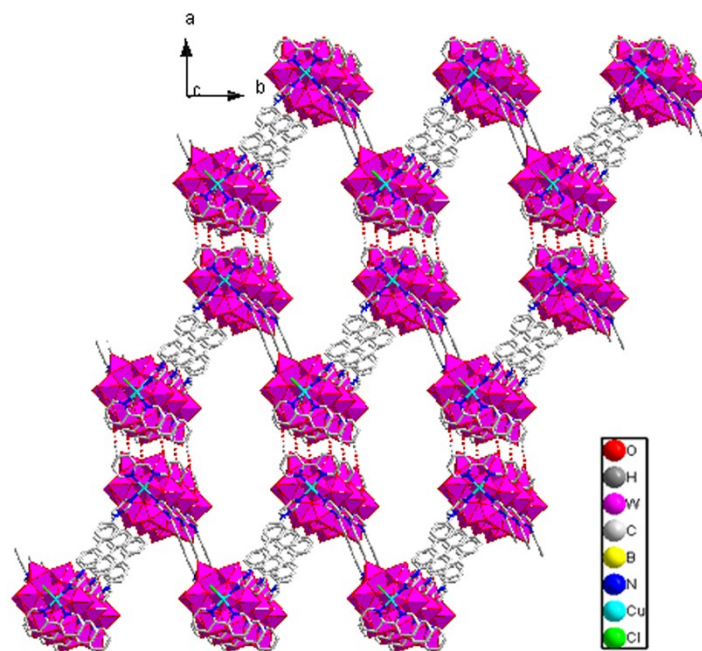

**Figure S2** The 3-D supramolecular network on the ab plane of compound **1**.

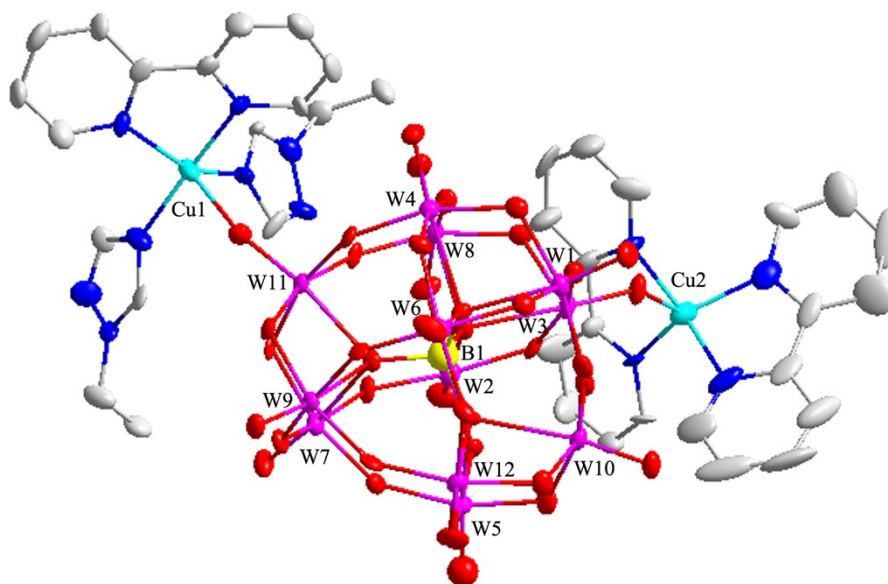

**Figure S3** ORTEP view of the basic units in compound **2** with 50% thermal ellipsoid.

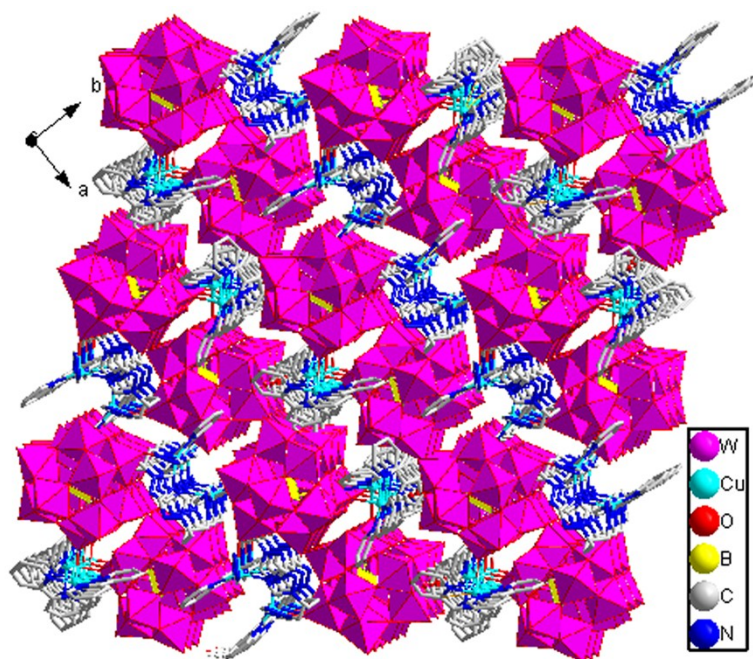

**Figure S4** The 3-D supramolecular network on the *ab* plane of compound **3** linked by weak interaction.

## 2. Structural data

**Table S1** Selected bond lengths (Å) and bond angles (°) of compound **1**

|            |         |            |         |             |         |
|------------|---------|------------|---------|-------------|---------|
| W(1)-O(1)  | 1.74(3) | W(5)-O(21) | 2.46(7) | W(10)-O(39) | 2.44(7) |
| W(1)-O(32) | 1.84(3) | W(6)-O(19) | 1.69(3) | W(10)-O(40) | 2.46(7) |
| W(1)-O(29) | 1.85(4) | W(6)-O(26) | 1.82(3) | W(11)-O(5)  | 1.69(4) |
| W(1)-O(11) | 1.89(4) | W(6)-O(23) | 1.85(3) | W(11)-O(22) | 1.91(3) |
| W(1)-O(13) | 1.88(4) | W(6)-O(38) | 1.90(4) | W(11)-O(45) | 1.93(3) |
| W(1)-O(37) | 2.42(7) | W(6)-O(28) | 1.93(3) | W(11)-O(17) | 1.94(3) |
| W(1)-O(33) | 2.43(7) | W(6)-O(40) | 2.40(7) | W(11)-O(25) | 1.94(3) |
| W(2)-O(8)  | 1.65(4) | W(6)-O(21) | 2.47(7) | W(11)-O(36) | 2.36(7) |
| W(2)-O(7)  | 1.85(3) | W(7)-O(2)  | 1.70(3) | W(11)-O(41) | 2.38(7) |
| W(2)-O(17) | 1.88(4) | W(7)-O(30) | 1.87(3) | W(12)-O(16) | 1.67(4) |
| W(2)-O(32) | 1.90(3) | W(7)-O(44) | 1.89(3) | W(12)-O(31) | 1.84(4) |
| W(2)-O(15) | 1.95(4) | W(7)-O(14) | 1.93(3) | W(12)-O(9)  | 1.86(3) |
| W(2)-O(37) | 2.43(7) | W(7)-O(22) | 1.93(3) | W(12)-O(34) | 1.91(4) |
| W(2)-O(36) | 2.46(7) | W(7)-O(41) | 2.39(7) | W(12)-O(29) | 1.94(3) |
| W(3)-O(18) | 1.72(3) | W(7)-O(39) | 2.46(7) | W(12)-O(33) | 2.38(7) |
| W(3)-O(6)  | 1.85(3) | W(8)-O(20) | 1.67(3) | W(12)-O(24) | 2.44(7) |
| W(3)-O(45) | 1.91(3) | W(8)-O(15) | 1.85(3) | B(1)-O(37)  | 1.46(8) |
| W(3)-O(44) | 1.91(3) | W(8)-O(34) | 1.88(4) | B(1)-O(21)  | 1.47(8) |
| W(3)-O(23) | 1.94(3) | W(8)-O(35) | 1.92(3) | B(1)-O(24)  | 1.50(8) |
| W(3)-O(41) | 2.43(7) | W(8)-O(25) | 1.92(4) | B(1)-O(33)  | 1.51(8) |
| W(3)-O(21) | 2.43(7) | W(8)-O(36) | 2.38(7) | B(1)-O(40)  | 1.52(8) |
| W(4)-O(4)  | 1.69(4) | W(8)-O(24) | 2.40(7) | B(1)-O(39)  | 1.56(8) |
| W(4)-O(38) | 1.86(4) | W(9)-O(42) | 1.70(4) | B(1)-O(36)  | 1.56(8) |
| W(4)-O(11) | 1.87(4) | W(9)-O(14) | 1.87(3) | B(1)-O(41)  | 1.58(8) |

|                  |           |                   |           |                   |           |
|------------------|-----------|-------------------|-----------|-------------------|-----------|
| W(4)-O(12)       | 1.93(3)   | W(9)-O(43)        | 1.88(4)   | Cu(1)-O(1)        | 2.36(3)   |
| W(4)-O(31)       | 1.96(4)   | W(9)-O(35)        | 1.88(3)   | Cu(2)-O(2)        | 2.26(3)   |
| W(4)-O(33)       | 2.39(7)   | W(9)-O(9)         | 1.92(3)   | Cu(1)-N(2)        | 1.94(4)   |
| W(4)-O(40)       | 2.43(7)   | W(9)-O(39)        | 2.35(7)   | Cu(1)-N(5)        | 2.00(3)   |
| W(5)-O(3)        | 1.67(4)   | W(9)-O(24)        | 2.48(7)   | Cu(1)-N(3)        | 2.03(3)   |
| W(5)-O(6)        | 1.89(3)   | W(10)-O(10)       | 1.67(3)   | Cu(1)-N(4)        | 2.05(4)   |
| W(5)-O(13)       | 1.91(4)   | W(10)-O(43)       | 1.87(4)   | Cu(2)-N(13)       | 1.98(3)   |
| W(5)-O(28)       | 1.93(3)   | W(10)-O(12)       | 1.89(4)   | Cu(2)-N(6)        | 1.99(3)   |
| W(5)-O(7)        | 1.93(4)   | W(10)-O(30)       | 1.90(3)   | Cu(2)-N(8)        | 2.02(3)   |
| W(5)-O(37)       | 2.45(7)   | W(10)-O(26)       | 2.01(3)   | Cu(2)-Cl(1)       | 2.250(12) |
| O(1)-W(1)-O(32)  | 100.6(16) | O(19)-W(6)-O(26)  | 98.9(17)  | O(5)-W(11)-O(22)  | 97.7(16)  |
| O(1)-W(1)-O(29)  | 98.6(16)  | O(19)-W(6)-O(23)  | 97.6(16)  | O(5)-W(11)-O(45)  | 97.4(16)  |
| O(1)-W(1)-O(11)  | 99.1(16)  | O(19)-W(6)-O(38)  | 102.6(16) | O(5)-W(11)-O(17)  | 97.7(16)  |
| O(1)-W(1)-O(13)  | 98.6(15)  | O(19)-W(6)-O(28)  | 94.7(16)  | O(5)-W(11)-O(25)  | 97.0(16)  |
| O(1)-W(1)-O(37)  | 157(2)    | O(19)-W(6)-O(40)  | 161(2)    | O(5)-W(11)-O(36)  | 159(2)    |
| O(1)-W(1)-O(33)  | 159(2)    | O(19)-W(6)-O(21)  | 158(2)    | O(5)-W(11)-O(41)  | 158(2)    |
| O(8)-W(2)-O(7)   | 101.7(17) | O(2)-W(7)-O(30)   | 98.0(15)  | O(16)-W(12)-O(31) | 99.3(17)  |
| O(8)-W(2)-O(17)  | 97.5(17)  | O(2)-W(7)-O(44)   | 101.3(15) | O(16)-W(12)-O(9)  | 99.8(16)  |
| O(8)-W(2)-O(32)  | 101.1(17) | O(2)-W(7)-O(14)   | 96.9(15)  | O(16)-W(12)-O(34) | 99.6(17)  |
| O(8)-W(2)-O(15)  | 96.9(17)  | O(2)-W(7)-O(22)   | 97.7(15)  | O(16)-W(12)-O(29) | 98.9(16)  |
| O(8)-W(2)-O(37)  | 160(2)    | O(2)-W(7)-O(41)   | 159(2)    | O(16)-W(12)-O(33) | 159(2)    |
| O(8)-W(2)-O(36)  | 157(2)    | O(2)-W(7)-O(39)   | 156(2)    | O(16)-W(12)-O(24) | 159(2)    |
| O(18)-W(3)-O(6)  | 101.7(15) | O(20)-W(8)-O(15)  | 98.9(16)  | N(2)-Cu(1)-N(5)   | 96.0(16)  |
| O(18)-W(3)-O(45) | 99.8(15)  | O(20)-W(8)-O(34)  | 98.1(16)  | N(2)-Cu(1)-N(3)   | 169.9(13) |
| O(18)-W(3)-O(44) | 99.7(15)  | O(20)-W(8)-O(35)  | 99.0(15)  | N(2)-Cu(1)-N(4)   | 92.0(14)  |
| O(18)-W(3)-O(23) | 97.2(15)  | O(20)-W(8)-O(25)  | 98.1(16)  | N(2)-Cu(1)-O(1)   | 84.4(14)  |
| O(18)-W(3)-O(41) | 159(2)    | O(20)-W(8)-O(36)  | 160(2)    | N(13)-Cu(2)-N(6)  | 174.8(13) |
| O(18)-W(3)-O(21) | 159(2)    | O(20)-W(8)-O(24)  | 158(2)    | N(13)-Cu(2)-N(8)  | 80.0(14)  |
| O(4)-W(4)-O(38)  | 99.7(16)  | O(42)-W(9)-O(14)  | 100.0(17) | N(13)-Cu(2)-Cl(1) | 93.0(10)  |
| O(4)-W(4)-O(11)  | 102.7(16) | O(42)-W(9)-O(43)  | 102.4(17) | N(13)-Cu(2)-O(2)  | 89.8(14)  |
| O(4)-W(4)-O(12)  | 95.7(16)  | O(42)-W(9)-O(35)  | 99.6(17)  | Cl(1)-Cu(2)-O(2)  | 106.1(10) |
| O(4)-W(4)-O(31)  | 101.5(16) | O(42)-W(9)-O(9)   | 100.8(16) | O(37)-B(1)-O(21)  | 72(4)     |
| O(4)-W(4)-O(33)  | 161(2)    | O(42)-W(9)-O(39)  | 161(2)    | O(37)-B(1)-O(24)  | 110(4)    |
| O(4)-W(4)-O(40)  | 156(2)    | O(42)-W(9)-O(24)  | 158(2)    | O(37)-B(1)-O(33)  | 75(4)     |
| O(3)-W(5)-O(6)   | 100.8(16) | O(10)-W(10)-O(43) | 102.6(17) | O(37)-B(1)-O(40)  | 110(4)    |
| O(3)-W(5)-O(13)  | 102.3(16) | O(10)-W(10)-O(12) | 97.2(17)  | O(37)-B(1)-O(39)  | 176(5)    |
| O(3)-W(5)-O(28)  | 95.4(16)  | O(10)-W(10)-O(30) | 100.0(16) | O(37)-B(1)-O(36)  | 73(4)     |
| O(3)-W(5)-O(7)   | 101.5(16) | O(10)-W(10)-O(26) | 98.0(16)  | O(37)-B(1)-O(41)  | 109(4)    |
| O(3)-W(5)-O(37)  | 160(2)    | O(10)-W(10)-O(39) | 160(2)    |                   |           |
| O(3)-W(5)-O(21)  | 159(2)    | O(10)-W(10)-O(40) | 157(2)    |                   |           |

Symmetry transformations used to generate equivalent atoms: #1 -x,-y,-z; #2 -x+1/2,-y+1/2,-z

**Table S2** Selected bond lengths (Å) and bond angles (°) of compound **2**

|            |           |            |           |             |           |
|------------|-----------|------------|-----------|-------------|-----------|
| W(1)-O(35) | 1.717(11) | W(5)-O(22) | 2.377(10) | W(10)-O(11) | 1.934(13) |
| W(1)-O(16) | 1.849(12) | W(6)-O(17) | 1.710(12) | W(10)-O(22) | 2.413(11) |
| W(1)-O(6)  | 1.869(11) | W(6)-O(11) | 1.856(12) | W(11)-O(25) | 1.730(12) |
| W(1)-O(8)  | 1.935(11) | W(6)-O(34) | 1.894(10) | W(11)-O(7)  | 1.887(10) |
| W(1)-O(1)  | 1.938(11) | W(6)-O(2)  | 1.927(12) | W(11)-O(31) | 1.894(12) |
| W(1)-O(36) | 2.368(11) | W(6)-O(16) | 1.960(11) | W(11)-O(9)  | 1.922(12) |
| W(2)-O(10) | 1.720(11) | W(6)-O(20) | 2.301(11) | W(11)-O(4)  | 1.929(10) |
| W(2)-O(1)  | 1.875(12) | W(7)-O(32) | 1.728(12) | W(11)-O(3)  | 2.292(11) |
| W(2)-O(7)  | 1.901(10) | W(7)-O(19) | 1.865(11) | W(12)-O(27) | 1.719(10) |

|                  |           |                   |           |                   |           |
|------------------|-----------|-------------------|-----------|-------------------|-----------|
| W(2)-O(39)       | 1.911(11) | W(7)-O(12)        | 1.903(10) | W(12)-O(21)       | 1.885(11) |
| W(2)-O(14)       | 1.917(11) | W(7)-O(29)        | 1.921(10) | W(12)-O(30)       | 1.891(12) |
| W(2)-O(36)       | 2.347(10) | W(7)-O(9)         | 1.942(12) | W(12)-O(28)       | 1.915(12) |
| W(3)-O(26)       | 1.710(12) | W(7)-O(3)         | 2.376(11) | W(12)-O(13)       | 1.920(12) |
| W(3)-O(15)       | 1.882(10) | W(8)-O(33)        | 1.717(12) | W(12)-O(22)       | 2.359(9)  |
| W(3)-O(8)        | 1.897(11) | W(8)-O(14)        | 1.906(10) | Cu(1)-N(3)        | 1.971(15) |
| W(3)-O(29)       | 1.917(11) | W(8)-O(38)        | 1.909(10) | Cu(1)-N(1)        | 1.990(16) |
| W(3)-O(39)       | 1.951(12) | W(8)-O(31)        | 1.915(12) | Cu(1)-N(7)        | 1.996(14) |
| W(3)-O(36)       | 2.346(10) | W(8)-O(2)         | 1.927(12) | Cu(1)-N(5)        | 2.000(13) |
| W(4)-O(37)       | 1.712(11) | W(8)-O(20)        | 2.356(10) | Cu(1)-O(25)       | 2.300(11) |
| W(4)-O(21)       | 1.902(12) | W(9)-O(24)        | 1.719(10) | Cu(2)-O(35)       | 2.393(11) |
| W(4)-O(38)       | 1.905(11) | W(9)-O(28)        | 1.866(12) | Cu(2)-N(10)       | 1.959(16) |
| W(4)-O(23)       | 1.910(12) | W(9)-O(23)        | 1.888(12) | Cu(2)-N(2)        | 1.966(16) |
| W(4)-O(34)       | 1.915(12) | W(9)-O(12)        | 1.926(10) | Cu(2)-N(11)       | 1.969(14) |
| W(4)-O(20)       | 2.426(9)  | W(9)-O(4)         | 1.933(11) | Cu(2)-N(9)        | 2.001(18) |
| W(5)-O(40)       | 1.674(16) | W(9)-O(3)         | 2.398(9)  | Cu(2)-O(35)       | 2.393(11) |
| W(5)-O(5)        | 1.886(12) | W(10)-O(18)       | 1.678(12) | B(1)-O(3)         | 1.55(3)   |
| W(5)-O(15)       | 1.911(10) | W(10)-O(6)        | 1.913(10) | B(1)-O(20)        | 1.51(3)   |
| W(5)-O(19)       | 1.918(11) | W(10)-O(5)        | 1.931(12) | B(1)-O(22)        | 1.50(3)   |
| W(5)-O(13)       | 1.918(9)  | W(10)-O(30)       | 1.932(10) | B(1)-O(36)        | 1.55(3)   |
| O(35)-W(1)-O(16) | 101.1(5)  | O(40)-W(5)-O(22)  | 172.1(6)  | O(18)-W(10)-O(11) | 101.8(6)  |
| O(35)-W(1)-O(6)  | 99.5(5)   | O(17)-W(6)-O(11)  | 101.4(6)  | O(18)-W(10)-O(22) | 171.3(5)  |
| O(35)-W(1)-O(8)  | 97.3(5)   | O(17)-W(6)-O(34)  | 97.5(5)   | O(25)-W(11)-O(7)  | 99.9(5)   |
| O(35)-W(1)-O(1)  | 100.4(5)  | O(17)-W(6)-O(2)   | 95.2(6)   | O(25)-W(11)-O(31) | 100.2(5)  |
| O(35)-W(1)-O(36) | 170.7(4)  | O(17)-W(6)-O(16)  | 99.8(5)   | O(25)-W(11)-O(9)  | 95.2(5)   |
| O(10)-W(2)-O(1)  | 99.4(5)   | O(17)-W(6)-O(20)  | 169.3(5)  | O(25)-W(11)-O(4)  | 97.8(5)   |
| O(10)-W(2)-O(7)  | 100.7(5)  | O(32)-W(7)-O(19)  | 100.8(5)  | O(25)-W(11)-O(3)  | 171.3(5)  |
| O(10)-W(2)-O(39) | 97.4(5)   | O(32)-W(7)-O(12)  | 98.2(5)   | O(27)-W(12)-O(21) | 101.5(5)  |
| O(10)-W(2)-O(14) | 100.0(5)  | O(32)-W(7)-O(29)  | 99.8(5)   | O(27)-W(12)-O(30) | 96.5(5)   |
| O(10)-W(2)-O(36) | 172.5(5)  | O(32)-W(7)-O(9)   | 96.4(5)   | O(27)-W(12)-O(28) | 101.9(5)  |
| O(26)-W(3)-O(15) | 101.2(6)  | O(32)-W(7)-O(3)   | 170.0(5)  | O(27)-W(12)-O(13) | 96.7(5)   |
| O(26)-W(3)-O(8)  | 98.9(6)   | O(33)-W(8)-O(14)  | 100.5(5)  | O(27)-W(12)-O(22) | 169.3(5)  |
| O(26)-W(3)-O(29) | 99.1(6)   | O(33)-W(8)-O(38)  | 98.5(5)   | N(3)-Cu(1)-N(1)   | 173.0(6)  |
| O(26)-W(3)-O(39) | 96.3(6)   | O(33)-W(8)-O(31)  | 99.9(6)   | N(3)-Cu(1)-N(7)   | 97.6(6)   |
| O(26)-W(3)-O(36) | 170.9(5)  | O(33)-W(8)-O(2)   | 98.8(6)   | N(3)-Cu(1)-N(5)   | 91.3(6)   |
| O(37)-W(4)-O(21) | 102.1(5)  | O(33)-W(8)-O(20)  | 171.0(5)  | N(3)-Cu(1)-O(25)  | 90.7(6)   |
| O(37)-W(4)-O(38) | 99.1(6)   | O(24)-W(9)-O(28)  | 103.1(5)  | N(10)-Cu(2)-N(2)  | 101.4(7)  |
| O(37)-W(4)-O(23) | 100.8(5)  | O(24)-W(9)-O(23)  | 100.1(5)  | N(10)-Cu(2)-N(11) | 82.5(6)   |
| O(37)-W(4)-O(34) | 99.6(6)   | O(24)-W(9)-O(12)  | 99.6(5)   | N(10)-Cu(2)-N(9)  | 141.7(6)  |
| O(37)-W(4)-O(20) | 170.1(5)  | O(24)-W(9)-O(4)   | 96.9(5)   | N(10)-Cu(2)-O(35) | 117.0(5)  |
| O(40)-W(5)-O(5)  | 96.7(7)   | O(24)-W(9)-O(3)   | 169.6(5)  | O(22)-B(1)-O(20)  | 112.0(19) |
| O(40)-W(5)-O(15) | 99.7(6)   | O(18)-W(10)-O(6)  | 100.7(5)  | O(22)-B(1)-O(36)  | 110(2)    |
| O(40)-W(5)-O(19) | 102.5(7)  | O(18)-W(10)-O(5)  | 97.8(6)   | O(22)-B(1)-O(3)   | 109(2)    |
| O(40)-W(5)-O(13) | 100.4(6)  | O(18)-W(10)-O(30) | 100.4(5)  |                   |           |

Symmetry transformations used to generate equivalent atoms: #1 -x,-y,-z; #2 -x+1/2,-y+1/2,-z

**Table S3** Selected Hydrogen Bond Lengths ( ) and Bond Angles (°) of complexes **1**

| D-H...A  | d(D-H)         | d(H...A) | <D-H...A | d(D...A) | Symmetry |
|----------|----------------|----------|----------|----------|----------|
| <b>1</b> | O1W-H1WB...O23 | 0.85     | 2.36     | 133.3    | 3.01(4)  |
|          | O1W-H1WA...O18 | 0.85     | 2.86     | 105.8    | 3.20(7)  |
|          | O2W-H2WB...O10 | 0.85     | 2.52     | 123.9    | 3.07(7)  |

### 3. Physical characterization

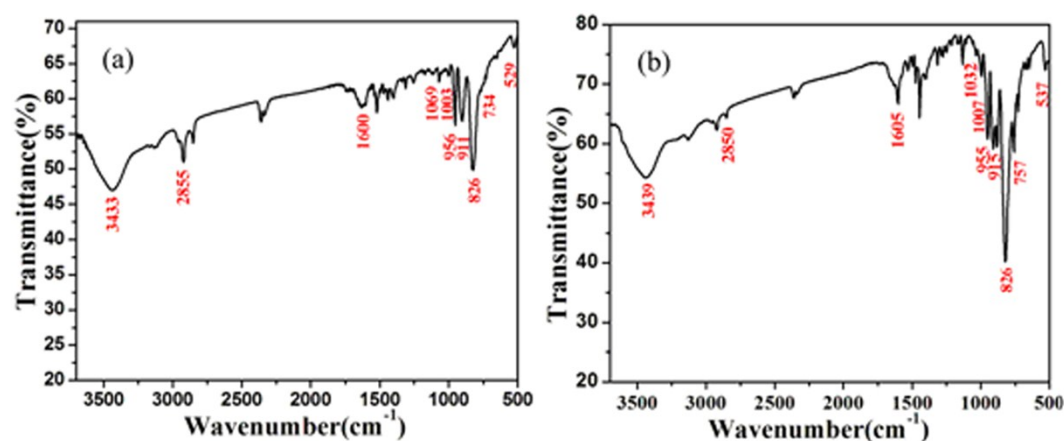

**Figure S5** IR spectra of (a) compound **1** and (b) compound **2**.

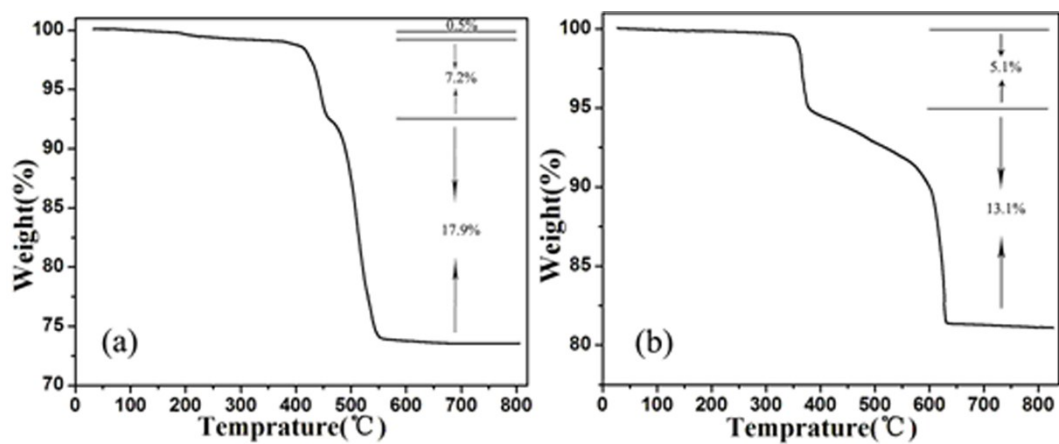

**Figure S6** TG of (a) compound **1** and (b) compound **2**.

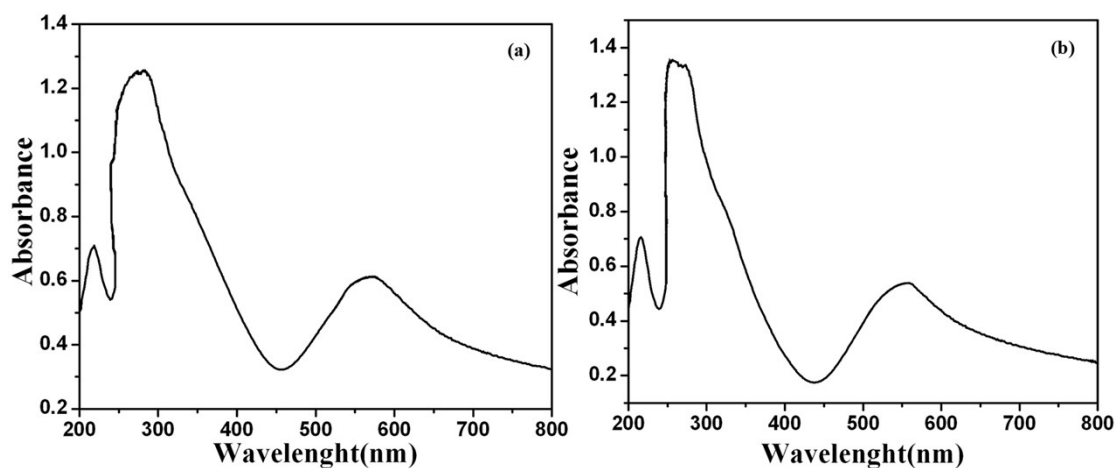

**Figure S7** The UV-vis absorption spectra of (a) compound 1 and (b) compound 2 in solid state at room temperature.

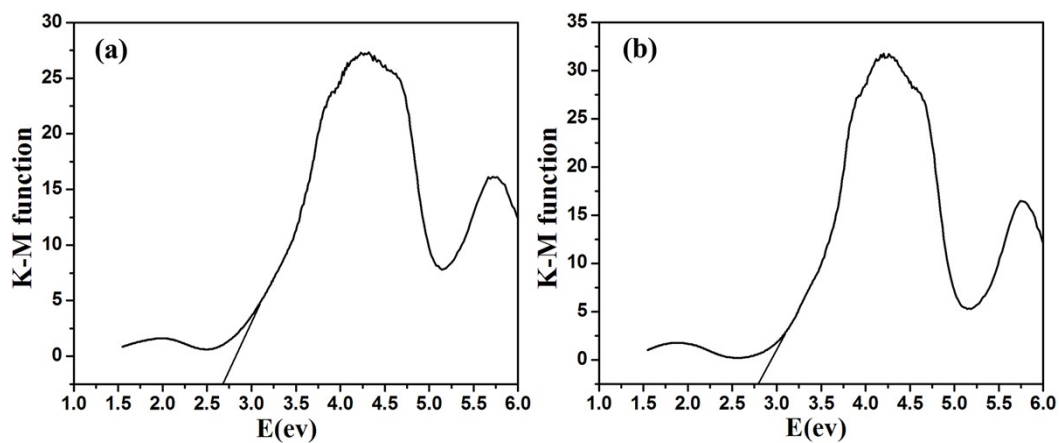

**Figure S8** The diffuse reflectance spectra of (a) compound 1 and (b) compound 2.

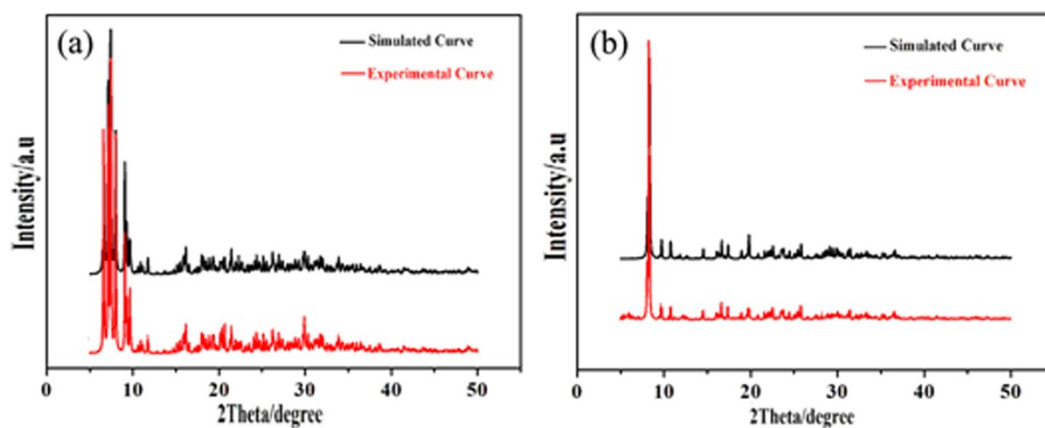

**Figure S9** The PXRD contrast curves of (a) compound 1 and (b) compound 2.



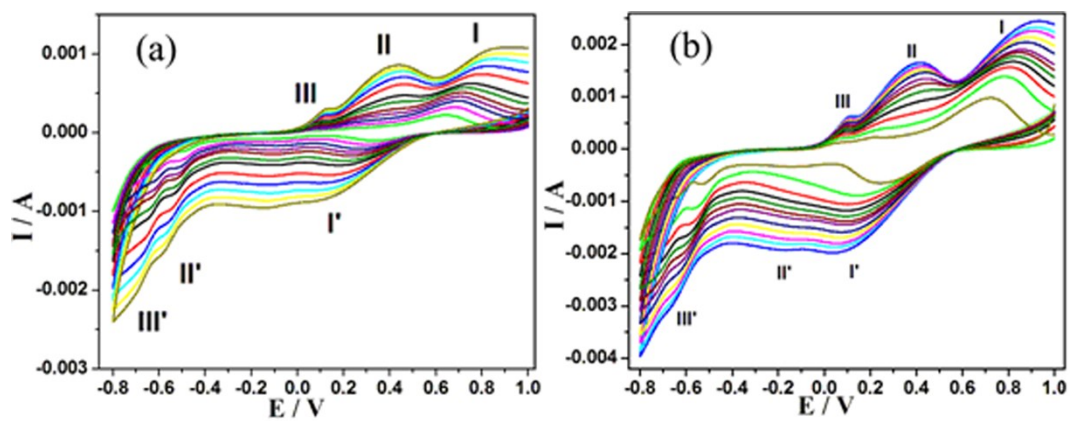

**Figure S10** Cyclic voltammograms of (a) 1-CPE and (b) 2-CPE,, rates (from inner to outer: 20, 30, 40, 60, 80, 100, 120, 150, 200, 250, 300, 350  $\text{mV s}^{-1}$ ). Potentials vs. SCE. (Insert plots: The dependence of anodic peak II current on scan rates.)
